# Supplementary material for: Preparation and photocatalytic activity of Au/TiO2 lyogels for hydrogen production
Source: Royal Society of Chemistry journal article supplement (doi:10.1039/c8se00293b), 2018-01-01
Supplement: c8se00293b1.pdf [file c8se00293b1.pdf]

## Supplementary Information

### Preparation and photocatalytic activity of Au/TiO<sub>2</sub> lyogels for hydrogen production

Lester Martínez<sup>a</sup>, Mónica Benito<sup>b</sup>, Ignasi Mata<sup>b,c</sup>, Lluís Soler<sup>a</sup>, Elies Molins<sup>b</sup>, Jordi Llorca<sup>a,\*</sup>

<sup>a</sup>Institute of Energy Technologies, Department of Chemical Engineering and Barcelona Research Center in Multiscale Science and Engineering, Universitat Politècnica de Catalunya, EEBE, 08019 Barcelona, Spain

<sup>b</sup>Institut de Ciència de Materials de Barcelona (ICMAB-CSIC), Campus UAB, 08193 Bellaterra, Spain

<sup>c</sup>Departament de Geologia, Universitat Autònoma de Barcelona, 08193 Bellaterra, Spain

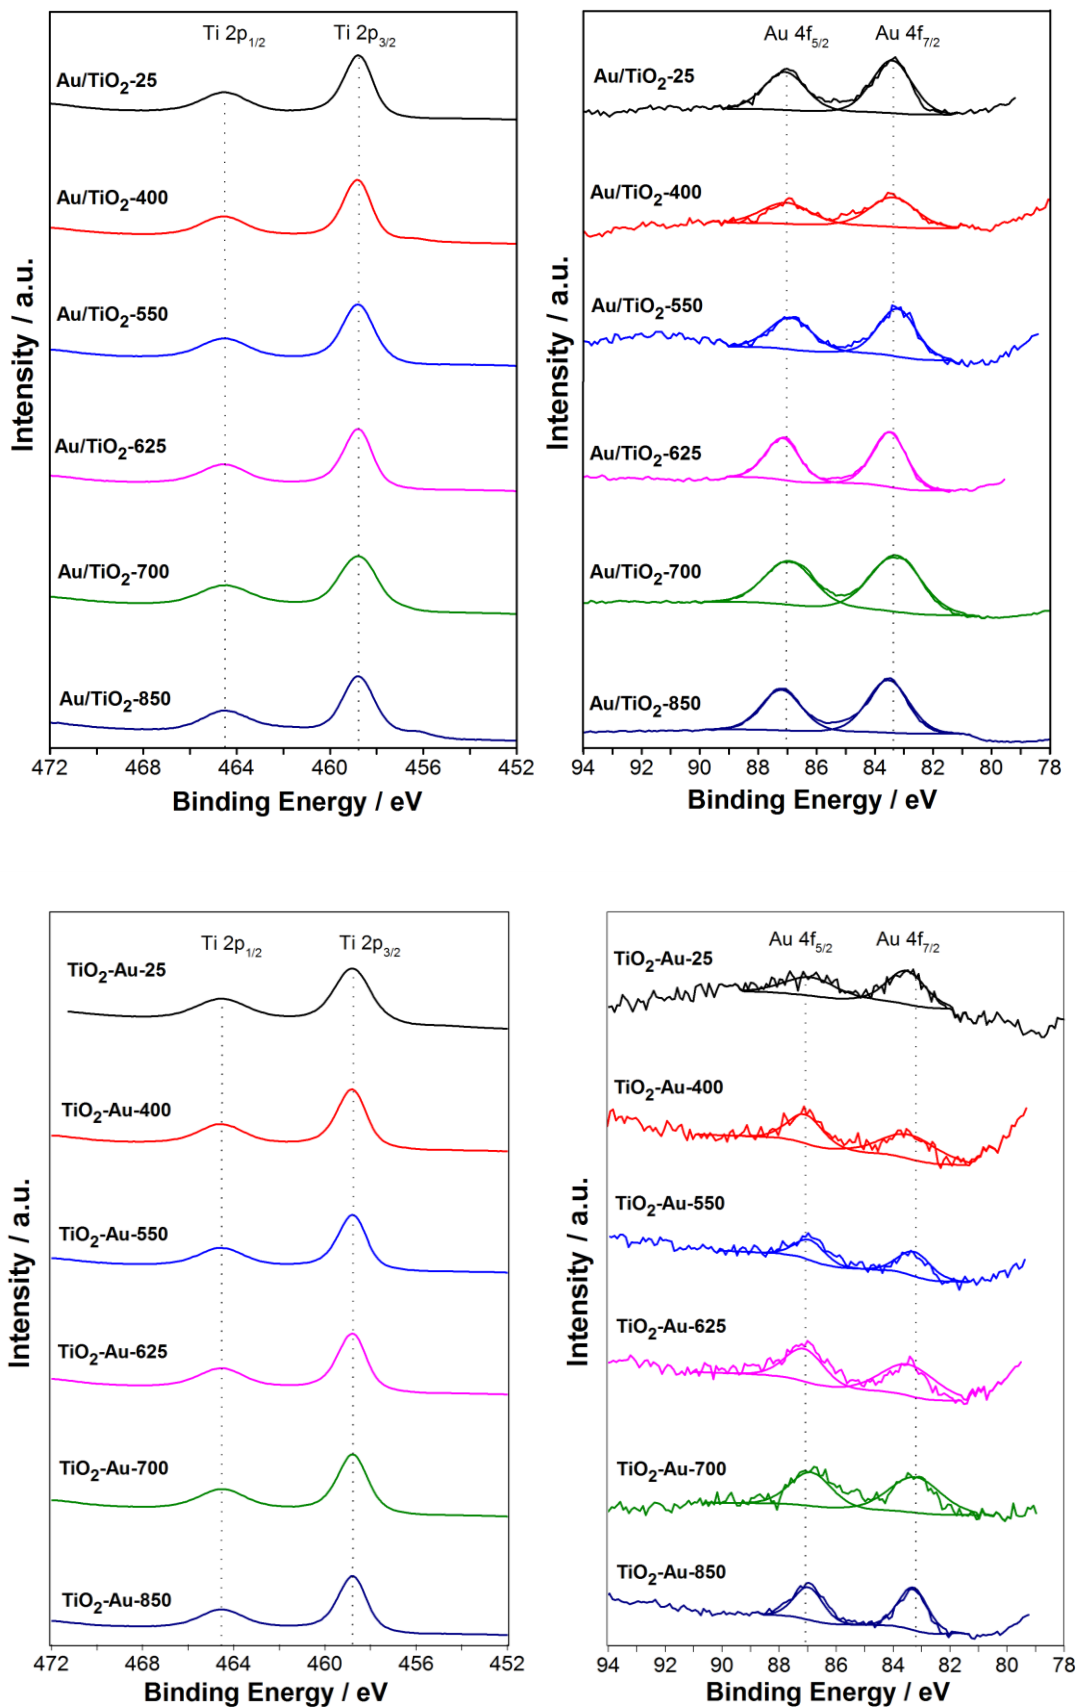

Fig. S1. Ti 2p and Au 4f X-ray photoelectron spectra.
